# Supplementary material for: Circular RNA-9119 suppresses in ovarian cancer cell viability via targeting the microRNA-21-5p–PTEN–Akt pathway
Source: PubMed Central journal article supplement (PMC7425477; doi:10.18632/aging.103470), 2020-07-16
Supplement: aging-12-103470-s001..pdf [file aging-12-103470-s001..pdf]

## SUPPLEMENTARY FIGURE

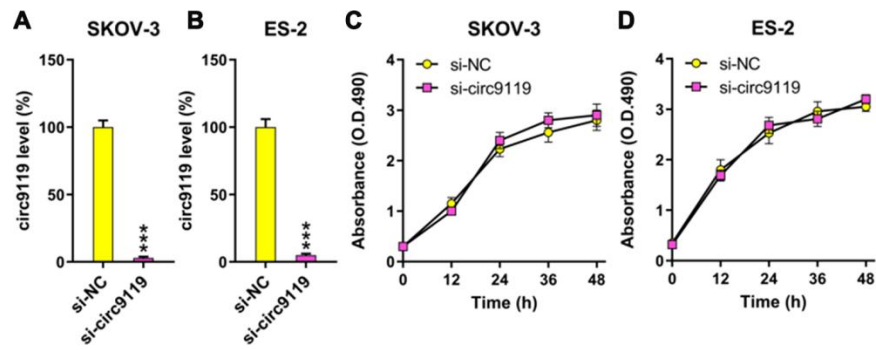

**Supplementary Figure 1. Role of circ9119 silencing on the proliferation of SKOV-3 and ES-2 cells.** (A, B) SKOV-3 and ES-2 cells were transfected with siRNA-NC or siRNA-circ9119. qRT-PCR examined the circ9119 expression. (C, D) MTT assay showed the proliferation rate of SKOV-3 and ES-2 cells at 12–48h post transfection.
